# Supplementary material for: Structural basis for DNA 5´-end resection by RecJ
Source: eLife journal article supplement (doi:10.7554/elife.14294), 2016-04-08
Supplement: supp [file elife_poa_e14294_Figure_1_figure_supplement_1.pdf › elife_poa_e14294_Figure_1_figure_supplement_1.pdf]

Figure 1—figure supplement 1

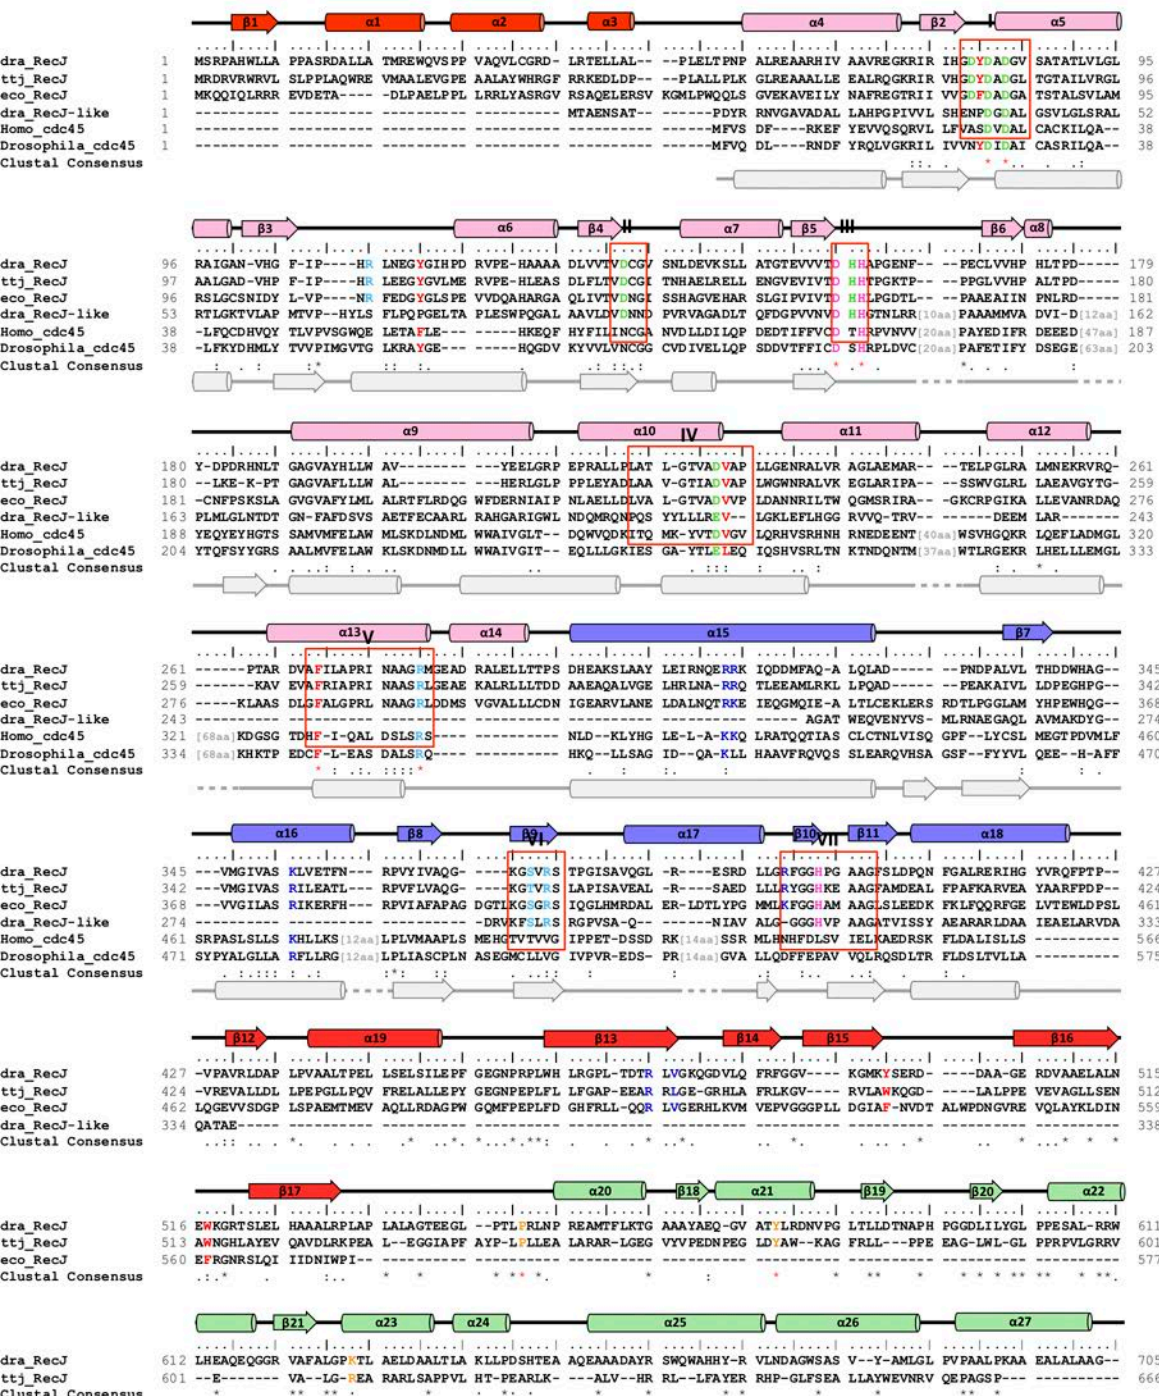

Residues involved in Mn<sup>2+</sup> coordination

Residues involved in catalysis

Residues involved in 5'-phosphate binding

Residues involved in stacking interaction

Residues involved in DNA recognition

Residues involved in SSB-Ct interaction
