# Supplementary figures and images for: Structural basis for DNA 5´-end resection by RecJ
Source: eLife journal article supplement (doi:10.7554/elife.14294), 2016-04-08

# Figure 1—figure supplement 2

|                        |   |    |      |     |   |    |      |     |   |    |     |     |     |
|------------------------|---|----|------|-----|---|----|------|-----|---|----|-----|-----|-----|
| [EDTA] mM              | - | 10 | -    | -   | - | -  | -    | -   | - | -  | -   | -   | -   |
| [Mn <sup>2+</sup> ] mM | - | -  | 0.01 | 0.1 | 1 | 10 | -    | -   | - | -  | 0.1 | 0.1 | 0.1 |
| [Mg <sup>2+</sup> ] mM | - | -  | -    | -   | - | -  | 0.01 | 0.1 | 1 | 10 | 1   | 10  | 0.1 |

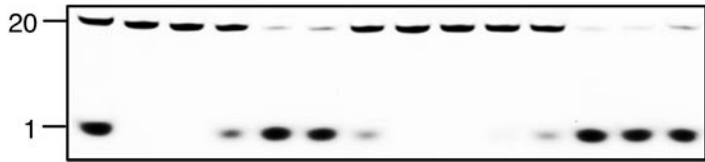

Supplement: supp [file elife_poa_e14294_Figure_1_figure_supplement_2.pdf › elife_poa_e14294_Figure_1_figure_supplement_2.pdf]

**Figure 2—figure supplement 1**

**A**

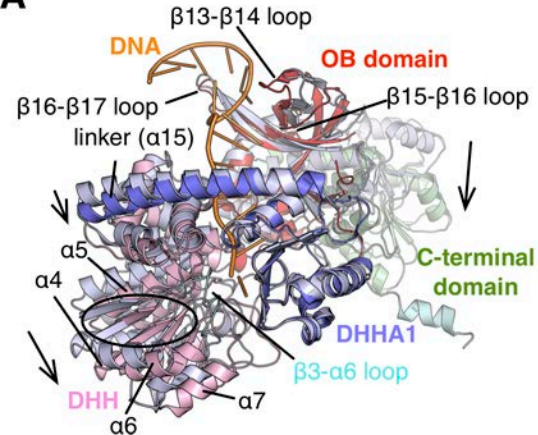

**B**

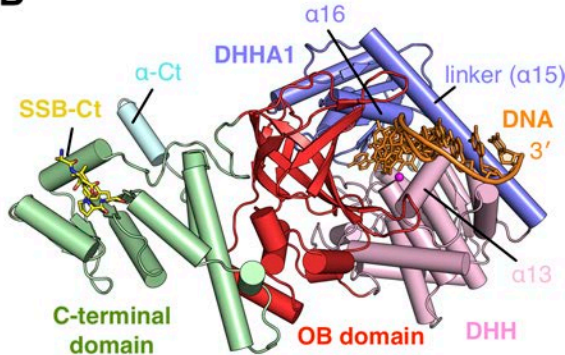

Supplement: supp [file elife_poa_e14294_Figure_2_figure_supplement_1.pdf › elife_poa_e14294_Figure_2_figure_supplement_1.pdf]

**Figure 2—figure supplement 2**

**A**

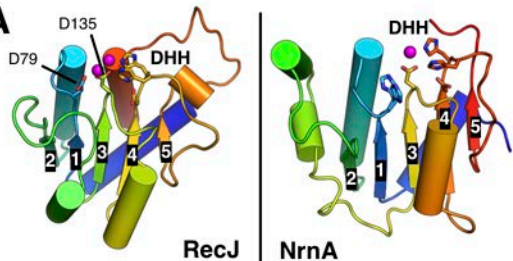

**Nuclease fold (DHH domains)**

**B**

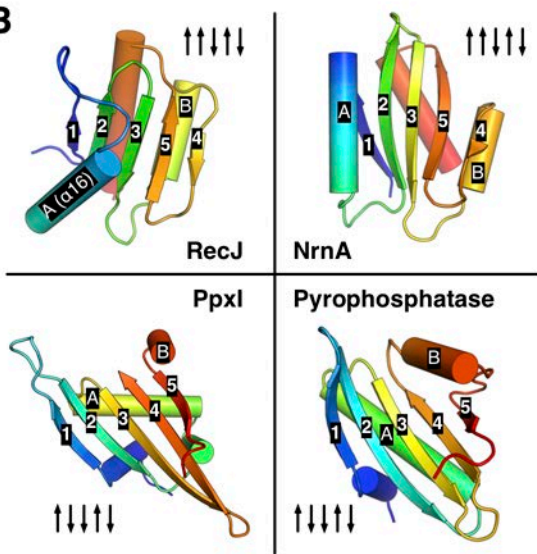

**DHHA1/DHHA2 domains**

Supplement: supp [file elife_poa_e14294_Figure_2_figure_supplement_2.pdf › elife_poa_e14294_Figure_2_figure_supplement_2.pdf]

**Figure 2—figure supplement 3**

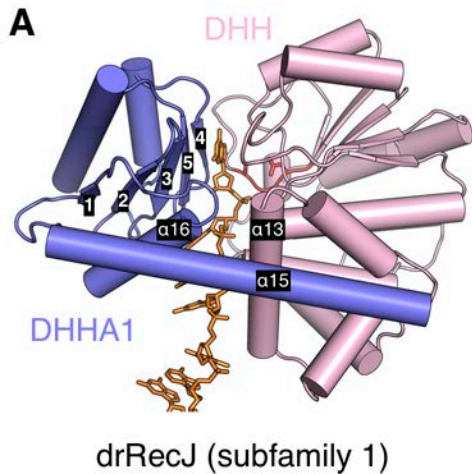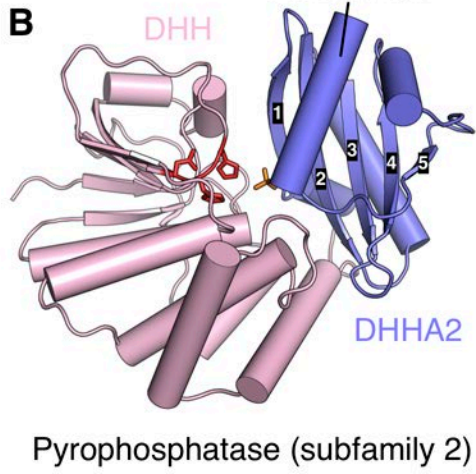

Supplement: supp [file elife_poa_e14294_Figure_2_figure_supplement_3.pdf › elife_poa_e14294_Figure_2_figure_supplement_3.pdf]

### Figure 3—figure supplement 1

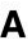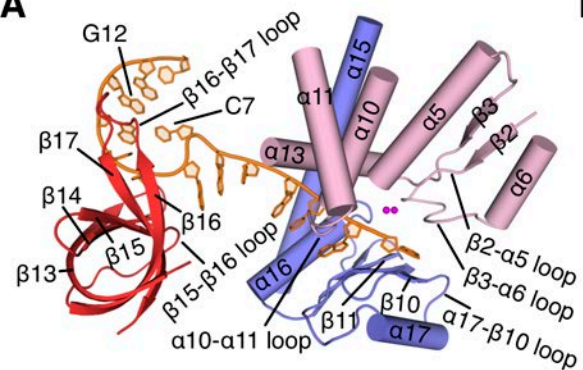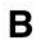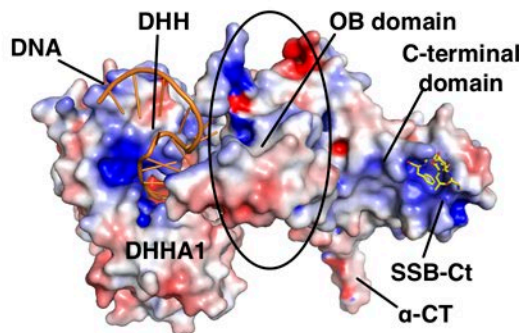

**C**

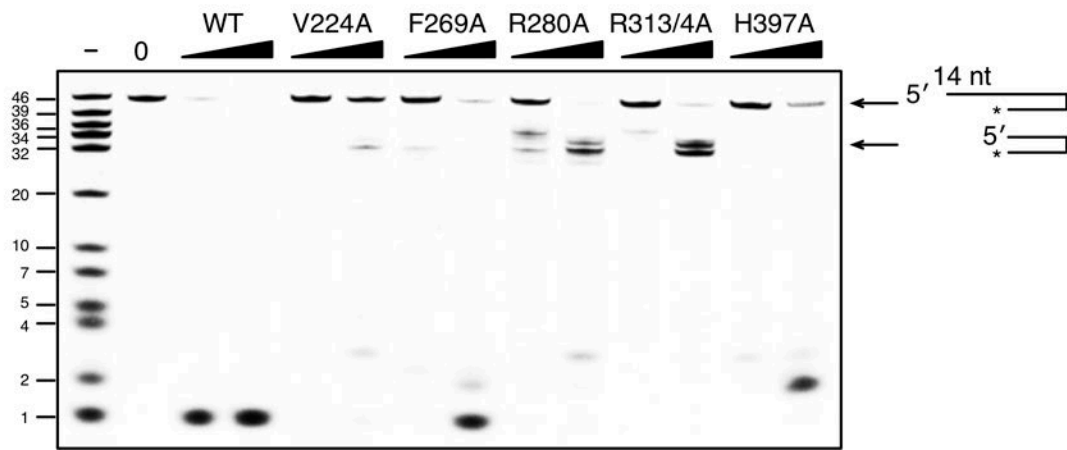

Supplement: supp [file elife_poa_e14294_Figure_3_figure_supplement_1.pdf › elife_poa_e14294_Figure_3_figure_supplement_1.pdf]

**Figure 3—figure supplement 2**

**A**

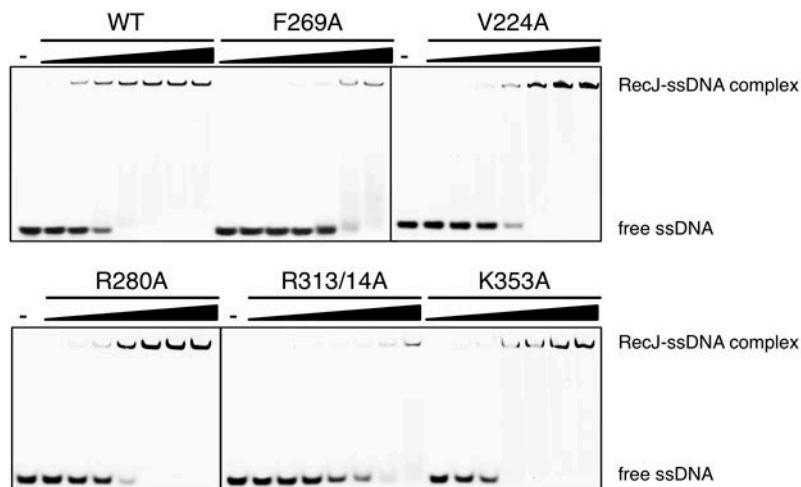

**B**

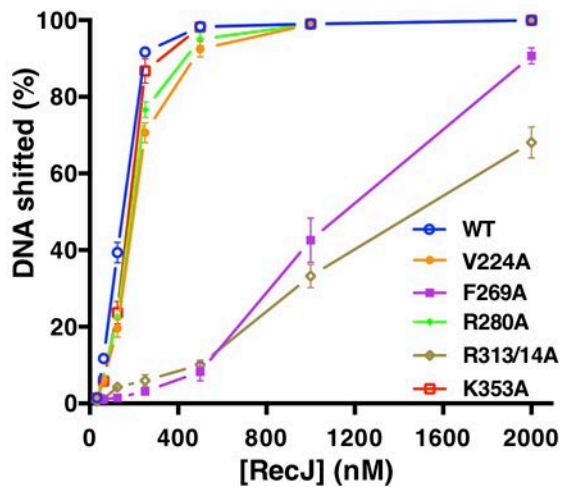

Supplement: supp [file elife_poa_e14294_Figure_3_figure_supplement_2.pdf › elife_poa_e14294_Figure_3_figure_supplement_2.pdf]

**Figure 4—figure supplement 1**

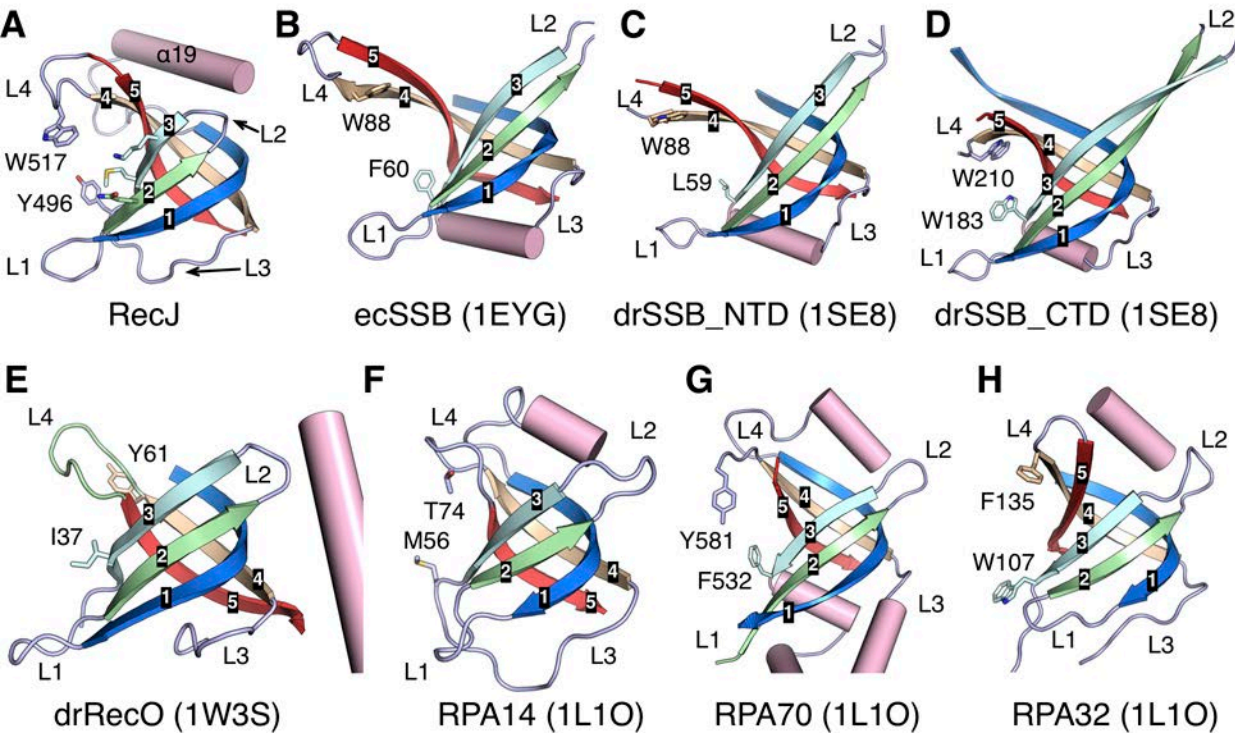

Supplement: supp [file elife_poa_e14294_Figure_4_figure_supplement_1.pdf › elife_poa_e14294_Figure_4_figure_supplement_1.pdf]

**Figure 5—figure supplement 1**

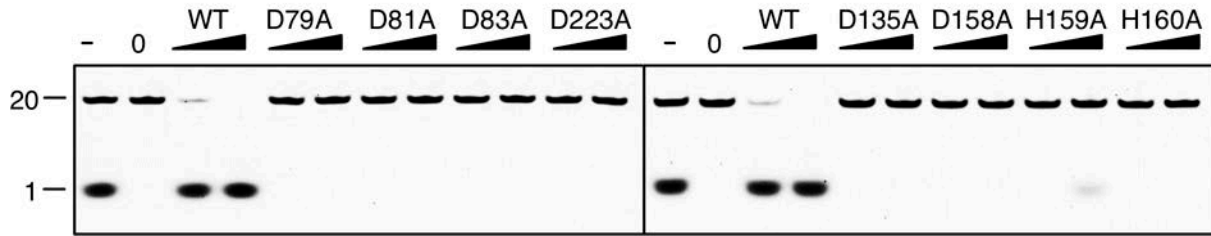

Supplement: supp [file elife_poa_e14294_Figure_5_figure_supplement_1.pdf › elife_poa_e14294_Figure_5_figure_supplement_1.pdf]

**Figure 6—figure supplement 1**

|                           |   |     |   |     |     |     |     |     |   |     |     |     |     |     |
|---------------------------|---|-----|---|-----|-----|-----|-----|-----|---|-----|-----|-----|-----|-----|
| [RecJ <sub>WT</sub> ] nM  | - | 2.5 | 5 | 2.5 | 5   | 2.5 | 5   | -   | - | -   | -   | -   | -   | -   |
| [RecJ <sub>575</sub> ] nM | - | -   | - | -   | -   | -   | -   | 2.5 | 5 | 2.5 | 5   | 2.5 | 5   | -   |
| [SSB <sub>WT</sub> ] nM   | - | -   | - | 200 | 200 | -   | -   | -   | - | 200 | 200 | -   | -   | 200 |
| [SSB <sub>ΔC</sub> ] nM   | - | -   | - | -   | -   | 200 | 200 | -   | - | -   | -   | 200 | 200 | -   |

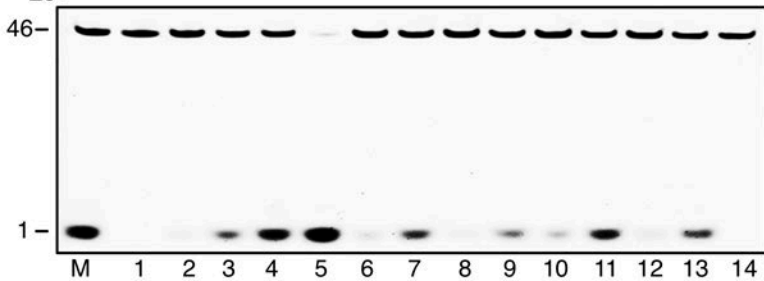

Supplement: supp [file elife_poa_e14294_Figure_6_figure_supplement_1.pdf › elife_poa_e14294_Figure_6_figure_supplement_1.pdf]

# Figure 6—figure supplement 2

**A**

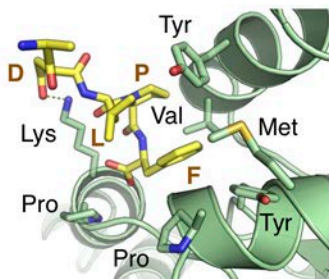

RecJ

**B**

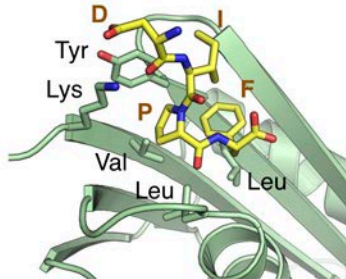

Rnase HI (4Z0U)

**C**

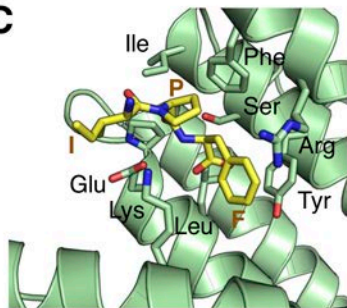

RecO (3Q8D)

**D**

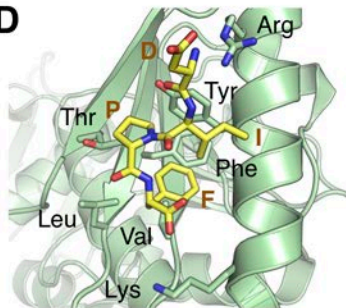

Pol III (3SXU)

Supplement: supp [file elife_poa_e14294_Figure_6_figure_supplement_2.pdf › elife_poa_e14294_Figure_6_figure_supplement_2.pdf]
